# Supplementary material for: Interaction between Growth Regulators Controls In Vitro Shoot Multiplication in Paulownia and Selection of NaCl-Tolerant Variants
Source: MDPI journal article supplement (doi:10.3390/plants11040498), 2022-02-11
Supplement: s1 [file s1]

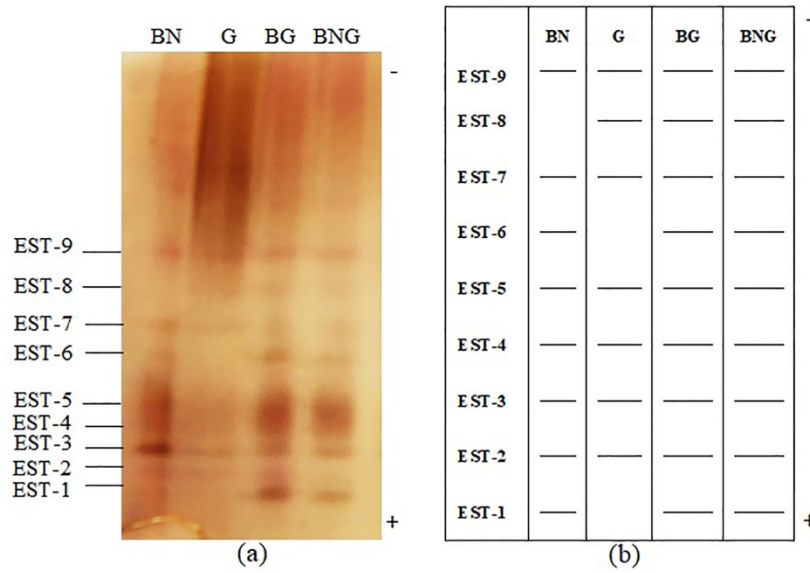

**Figure S1.** (a) Profile of esterase isoenzyme of paulownia microshoots grown for one month on semisolid MS medium with 2 mg/l BAP and 0.1 mg/l NAA (lane BN); MS with 0.1 mg/l GA (lane G); MS with 2 mg/l BAP and 0.1 mg/GA (lane BG); or MS with 2 mg/l BAP, 0.1 mg/l NAA and 0.1 mg/l GA (lane BNG). (b) Diagrammatic shape illustrates the distribution of bands inside the esterase gel.

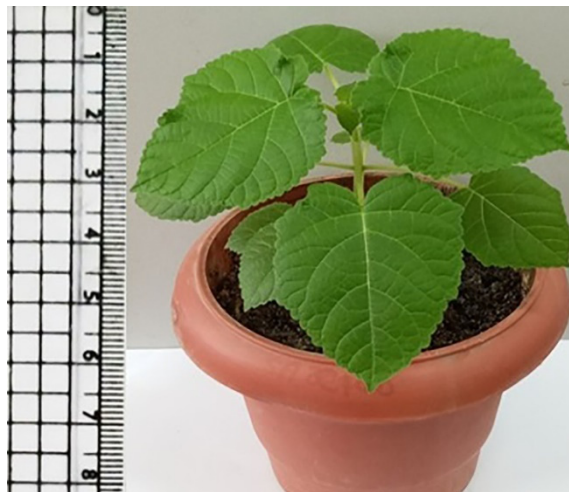

**Figure S2.** Two months age paulownia plant after acclimatization and transferring to open conditions

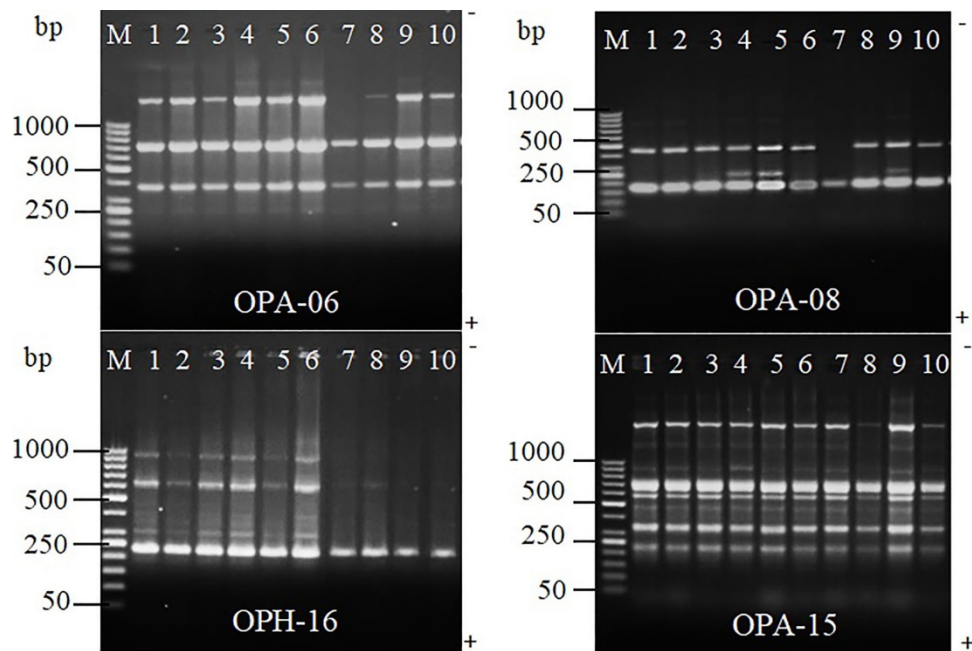

**Figure S3.** RAPD-PCR amplification patterns obtained from different primers of ten shoot lines of paulownia subjected for 14 successive subcultures on semisolid MS medium with 2 mg/l BAP and 0.1 mg/l NAA. Lane M: 50 bp DNA ladder.

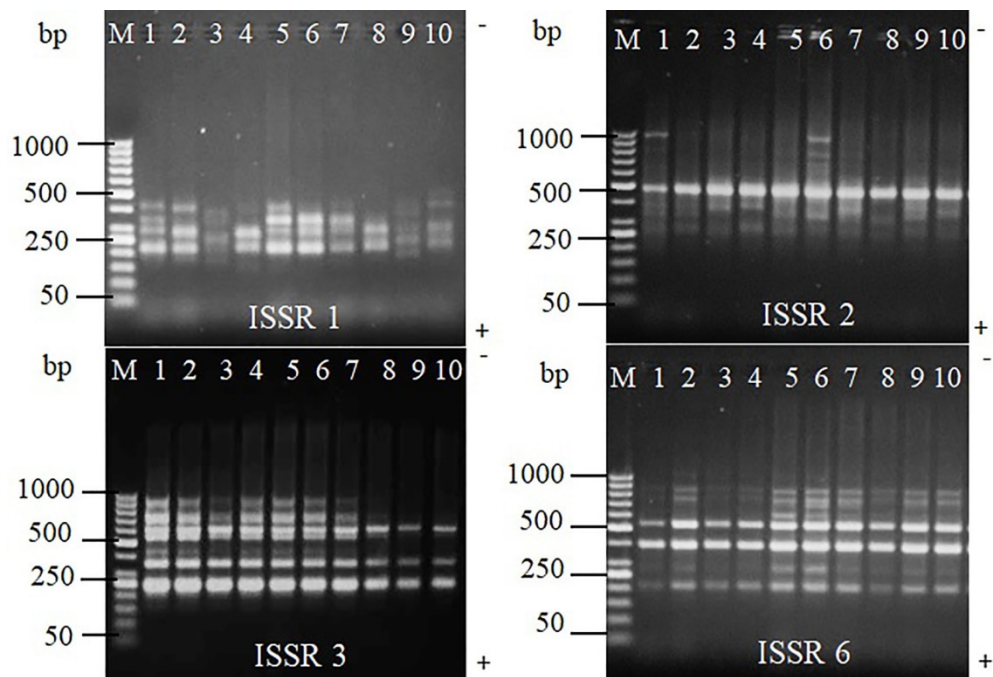

**Figure S4.** ISSR-PCR amplification patterns obtained from different primers of ten shoot lines of paulownia subjected for 14 successive subcultures on semisolid MS medium with 2 mg/l BAP and 0.1 mg/l NAA. Lane M: 50 bp DNA ladder.

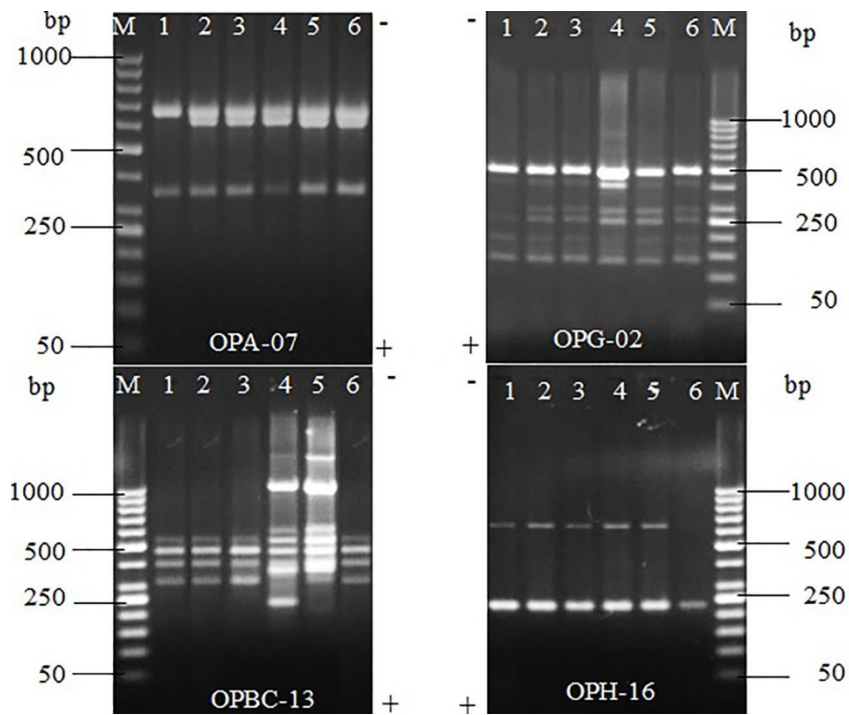

**Figure S5.** RAPD-PCR amplification patterns obtained from different primers of five selected-NaCl tolerant lines (lanes 2-6) in comparison to that of control (lane 1). M: 50 bp DNA ladder.

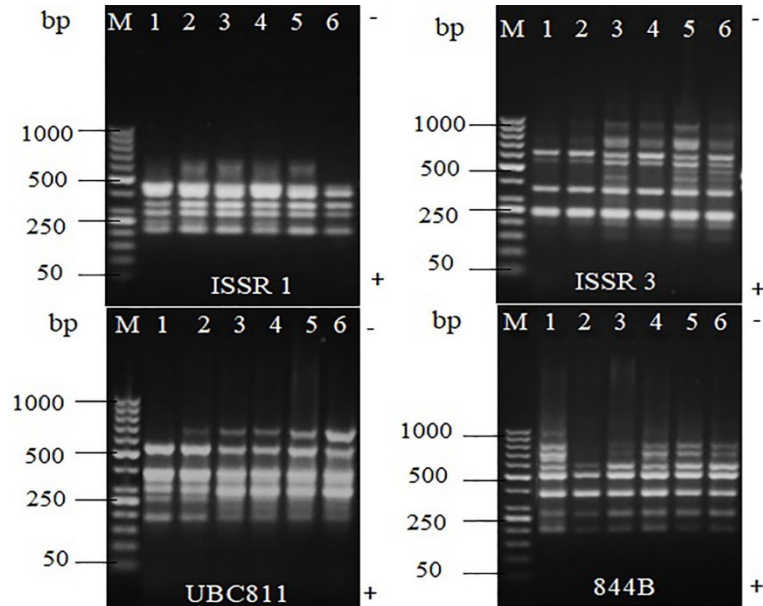

**Figure S6.** ISSR-PCR amplification patterns obtained from different primers of five selected-NaCl tolerant lines (lanes 2-6) in comparison to that of control (lane 1). M: 50 bp DNA ladder.
